# Supplementary material for: Increased Persistent Sodium Current Due to Decreased PI3K Signaling Contributes to QT Prolongation in the Diabetic Heart
Source: PubMed Central journal article supplement — Diabetes. 2013 Nov 16;62(12):4257–65. doi: 10.2337/db13-0420 (PMC3837031; doi:10.2337/db13-0420), 2013-11-16

SUPPLEMENTARY DATA

**Supplementary Figure 1.** APD measured in *Ins2<sup>Akita</sup>* myocytes perfused with mexiletine. Upper panels: Representative action potential traces recorded from *Ins2<sup>Akita</sup>* myocytes in the presence or absence of 4-AP (4 mM) at baseline or 5 min after perfusion with mexiletine (4  $\mu$ g/ml). Lower panel: Summary data (mean  $\pm$  SE) of APD<sub>90</sub> in *Ins2<sup>Akita</sup>* myocytes. N = 7 cells in each group.

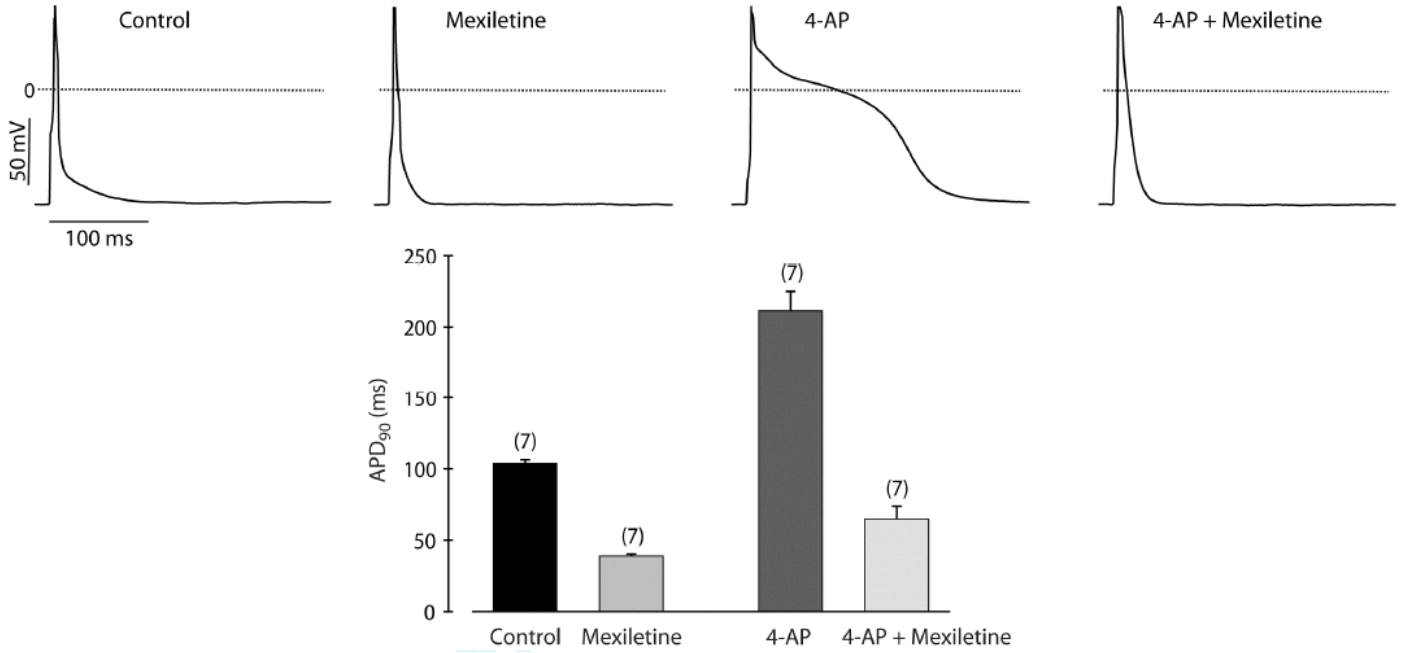

SUPPLEMENTARY DATA

**Supplementary Figure 2.** APD measured without 4-AP (see Figure 1D). Ventricular myocytes were prepared from diabetic *Ins2<sup>Akita</sup>* (Akita) and *db/db* mice or normoglycemic wild-type (WT) mice. Action potentials were recorded in the absence of 4-AP with or without intracellular infusion of 1  $\mu$ M phospholipids or after a 2 h preincubation with 4  $\mu$ g/ml mexiletine. Summary data of APD<sub>90</sub> are shown as mean  $\pm$  SE. The number of cells studied is above each bar.

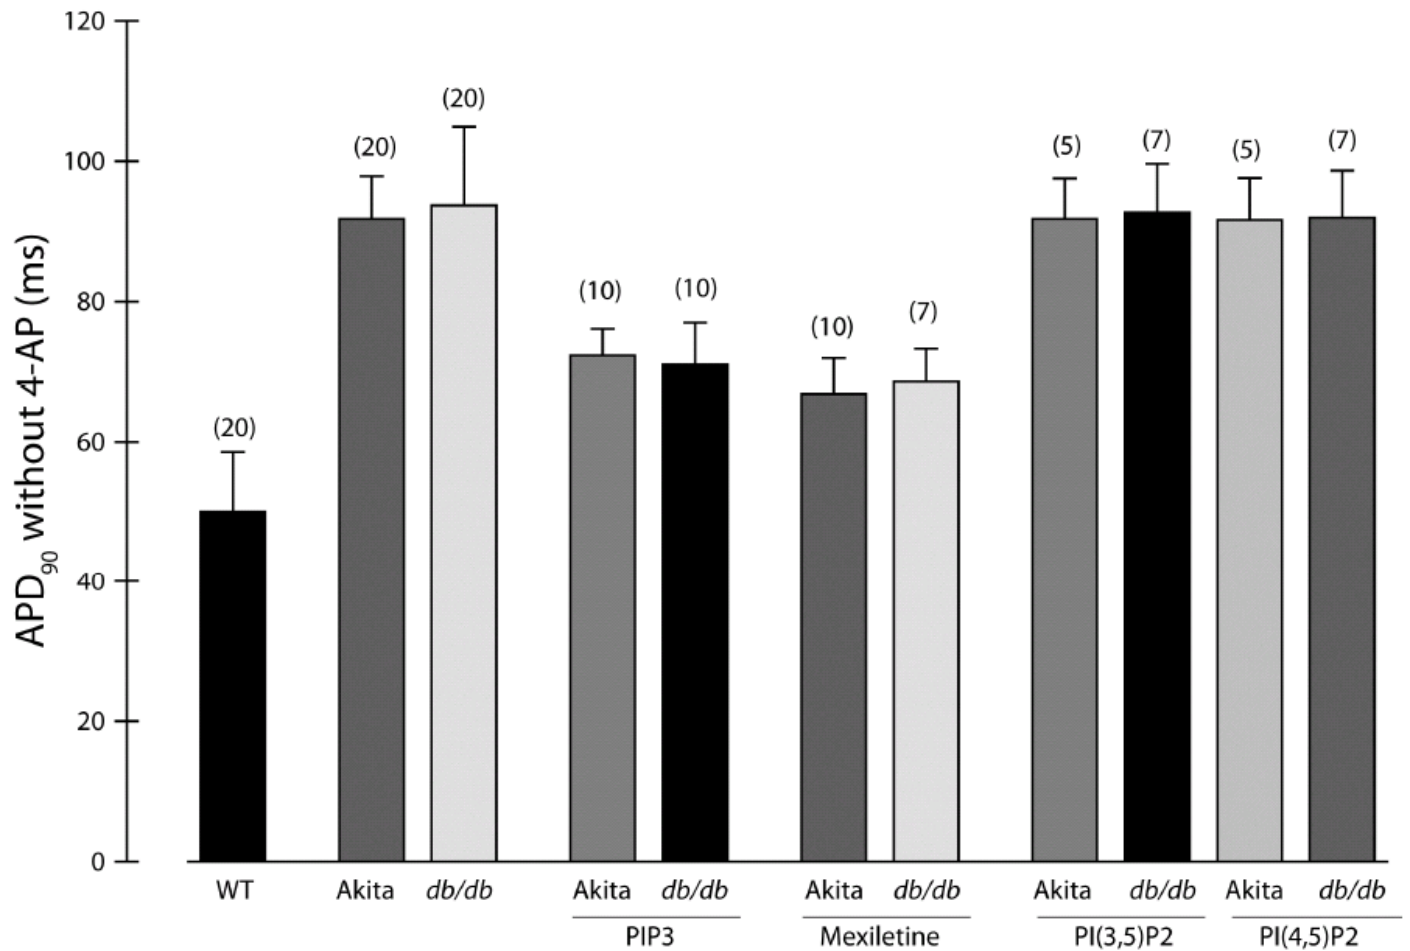

SUPPLEMENTARY DATA

**Supplementary Figure 3.** Nav1.5, PDK1 and PTEN expression levels. **(A)** Heart membrane preparations from *db/db*, *Ins2<sup>Akita</sup>* (Akita) and wild-type (WT) mice were analyzed by western blotting with an Nav1.5 antibody. The blot was reprobed with an HSP90 antibody as a loading control. **(B)** Total heart lysates were analyzed by western blotting with the indicated antibodies.

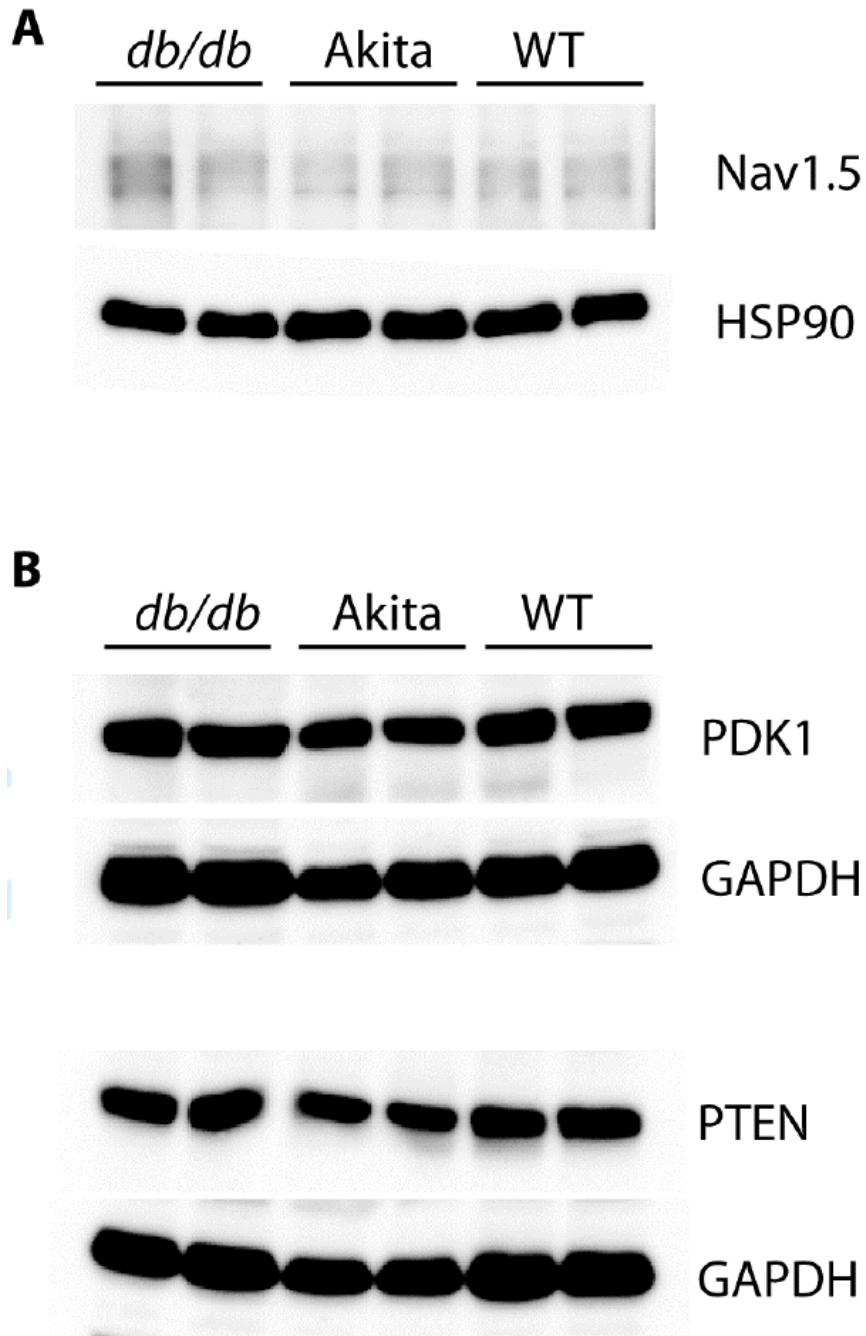

SUPPLEMENTARY DATA

**Supplementary Figure 4.** Bazett heart rate correction of QT intervals measured in Fig. 3A & B. Cardiac electrical activity was recorded from spontaneously beating hearts mounted on a Langendorff apparatus. QT intervals corrected for heart rate (QTc) were calculated from the tracings using the Bazett formula (15). Summary QTc graphs show mean  $\pm$  SE. **(A)** Akita and wild-type (WT) hearts were treated with insulin (1 unit/L), PI-103 (500 nM) or mexiletine (4  $\mu$ g/mL) added to the perfusate.  $N \geq 4$  hearts per group. **(B)** *db/db* hearts before and after mexiletine treatment.  $N = 5$  hearts.

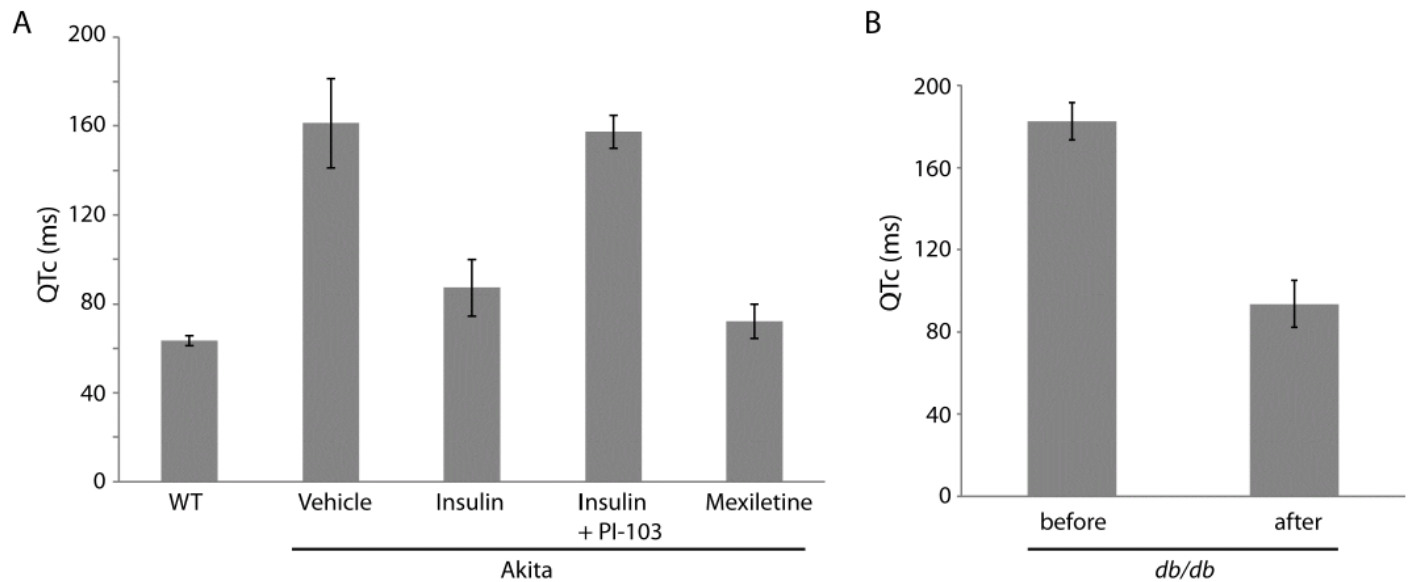

**Supplementary Figure 5.** Expression of CAP110 $\alpha$  in cultured *Ins2<sup>Akita</sup>* (A) and *db/db* (B) myocytes. Myocytes were infected with adenoviruses carrying HA-tagged CAP110 $\alpha$  or GFP as a control. Cells were harvested 48 h later and lysates were analyzed by western blotting using the indicated antibodies.

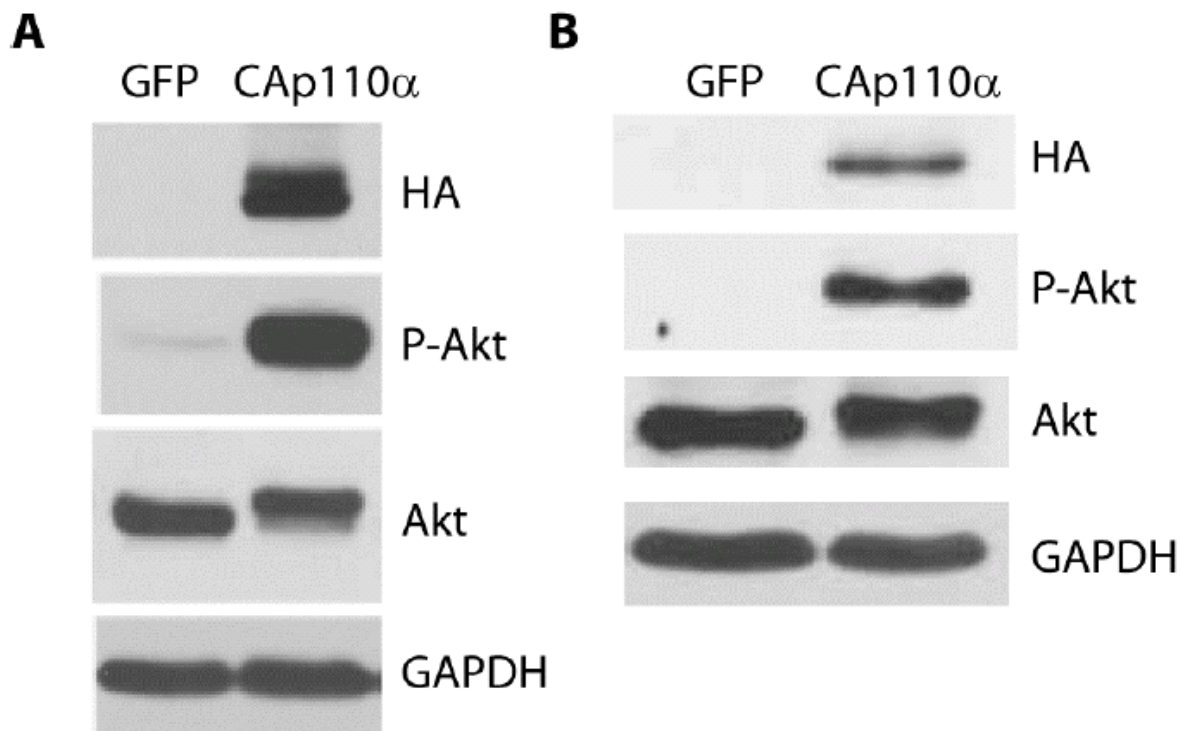

SUPPLEMENTARY DATA

**Supplementary Figure 6.** Action potential duration measured without 4-AP (see Figure 5B). Cultured myocytes from wild-type (WT), *db/db* and *Ins2<sup>Akita</sup>* (Akita) mice were infected with adenoviruses carrying either CAP110 $\alpha$  or GFP as a control. Action potential recordings were made in the absence of 4-AP. Summary graph of APD<sub>90</sub> shows mean  $\pm$  SE. The number of cells studied is above each bar.

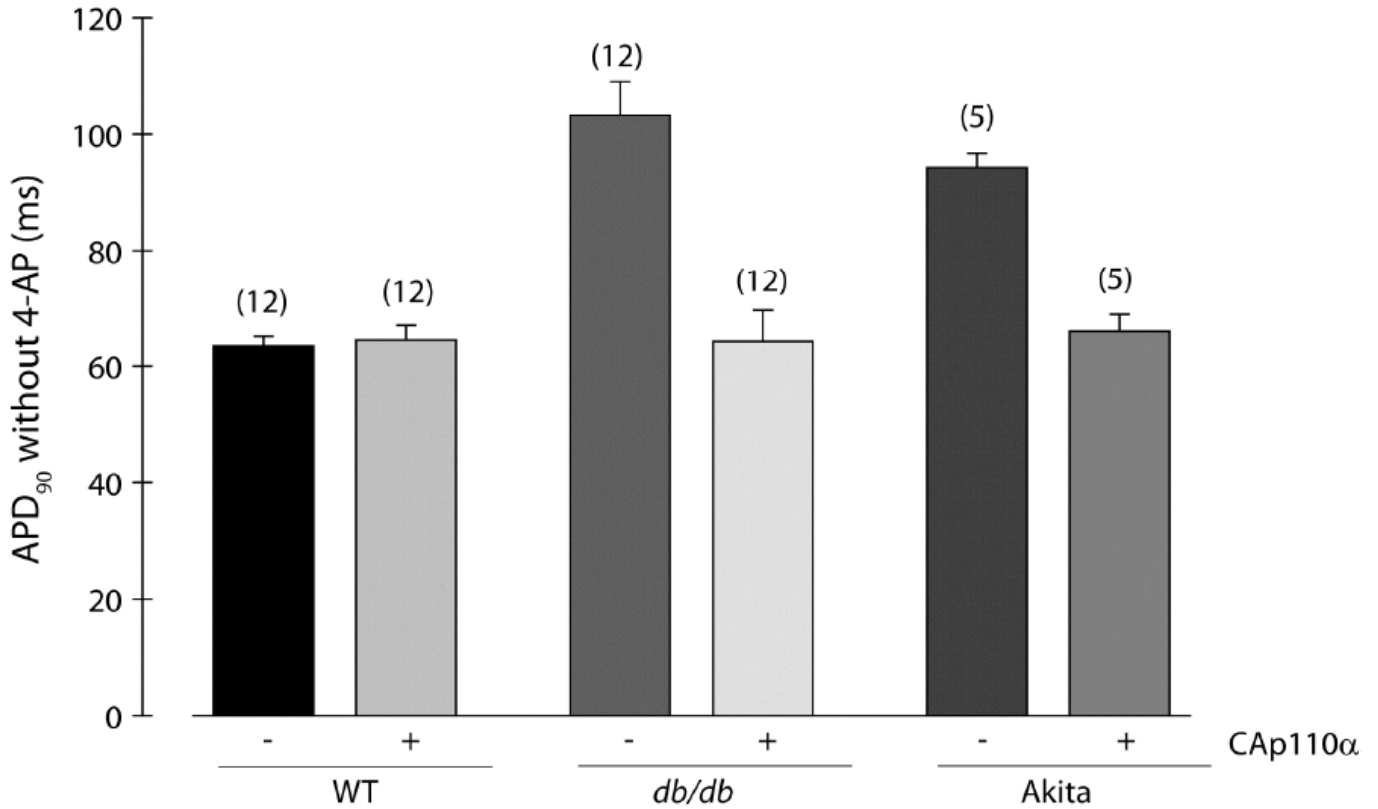

**Supplementary Figure 7.** Akt inhibitor (Akti) increases  $I_{NaP}$  in wild-type myocytes. Cardiac myocytes isolated from wild-type mice were treated with 10  $\mu$ M Akti for 2 h at room temperature prior to measuring  $I_{NaP}$ . N = 7 cells per group.

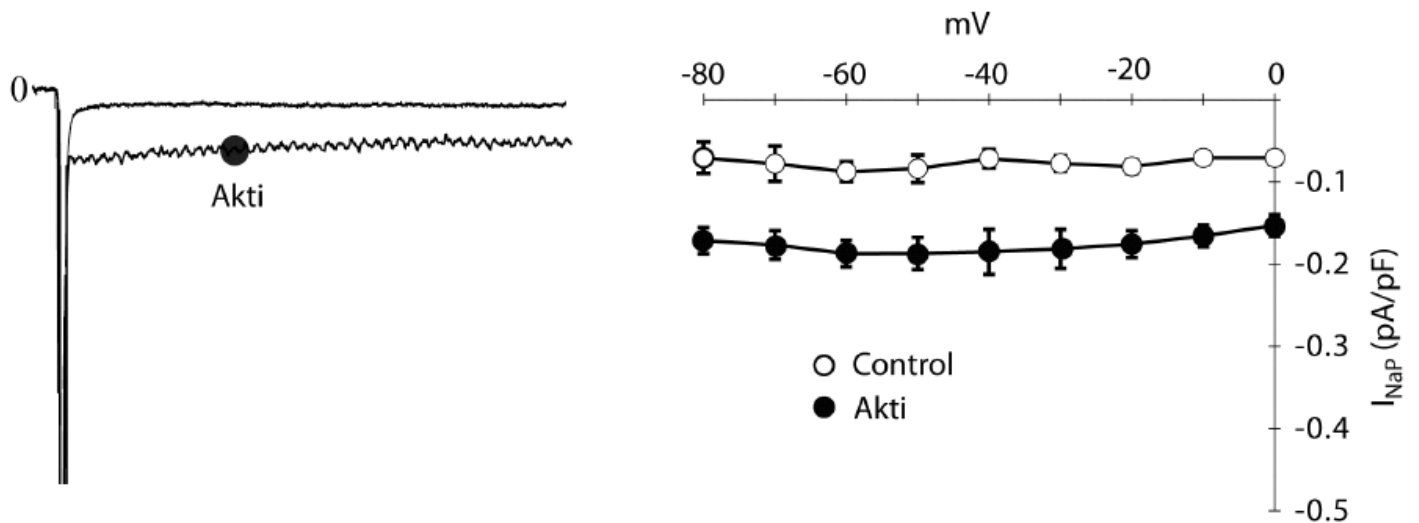

Supplement: supp_db13-0420_DB130420SupplementaryData.pdf [file supp_db13-0420_DB130420SupplementaryData.pdf]
